# Supplementary material for: Donor–Acceptor–Donor 1H-Benzo[d]imidazole Derivatives as Optical Waveguides
Source: MDPI journal article supplement (doi:10.3390/molecules28124631), 2023-06-08
Supplement: s1 [file s1]

# Donor-Acceptor-Donor 1*H*-benzo[*d*]imidazole Derivatives as Optical Waveguides

Carlos Tardío <sup>1</sup>, Javier Álvarez Conde <sup>2</sup>, Ana M. Rodríguez <sup>1</sup>, Pilar Prieto <sup>1</sup>, Antonio de la Hoz <sup>1,\*</sup>,  
Juan Cabanillas-González <sup>2,\*</sup> and Iván Torres-Moya <sup>3,\*</sup>

<sup>1</sup> Department of Inorganic, Organic Chemistry and Biochemistry, Faculty of Chemical Science and Technologies, University of Castilla-La Mancha-IRICA, 13071 Ciudad Real, Spain; carlos.tardio@uclm.es (C.T.); anamaria.rfdez@uclm.es (A.M.R.); mariapilar.prieto@uclm.es (P.P.)

<sup>2</sup> Madrid Institute for Advanced Studies, IMDEA Nanociencia, Calle Faraday 9, Ciudad Universitaria de Cantoblanco, 28049 Madrid, Spain; javier.alvarez@imdea.org

<sup>3</sup> Department of Organic Chemistry, Faculty of Chemical Sciences, Campus of Espinardo, University of Murcia, 30010 Murcia, Spain

\* Correspondence: antonio.hoz@uclm.es (A.d.l.H.); juan.cabanillas@imdea.org (J.C.-G.); ivan.torres@um.es (I.T.-M.)

## S1. Theoretical Calculations

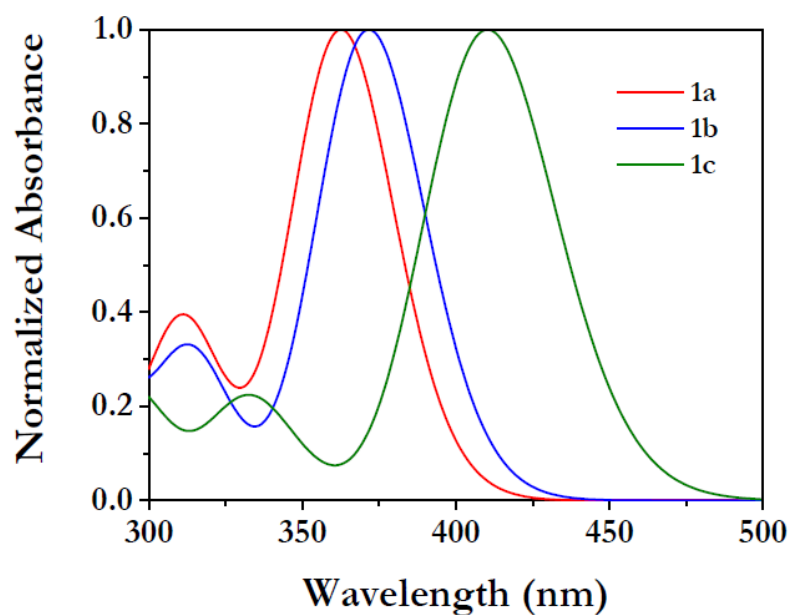

**Figure S1.** UV-Vis absorption of derivatives **1** computed at the M06-2X/6-311+G(2d,p) level. Solvent effects were estimated using the polarizable continuum model (PCM) within the self-consistent reaction field (SCRF) approach using chloroform ( $\epsilon = 4.7113$ ) as solvent.

**Table S1.** Photophysical properties of **1a-c** computed at the M06-2X/6-311+G(2d,p) level.

| Compound  | $\lambda_{\text{abs}}$ | $f$  | Description                                          |
|-----------|------------------------|------|------------------------------------------------------|
| <b>1a</b> | 357                    | 2.01 | H $\rightarrow$ L (94%)                              |
|           | 313                    | 0.68 | H-1 $\rightarrow$ L (87%)                            |
| <b>1b</b> | 371                    | 2.01 | H $\rightarrow$ L (88%)                              |
|           | 313                    | 0.64 | H-4 $\rightarrow$ L (49%), H-1 $\rightarrow$ L (38%) |
| <b>1c</b> | 409                    | 2.60 | H $\rightarrow$ L (90%)                              |
|           | 332                    | 0.57 | H-1 $\rightarrow$ L (46%), H-3 $\rightarrow$ L (21%) |

## S2. X-Ray Diffraction

**Table S2.** Crystal data and structure refinement for **1b**.

|                                       |                    |
|---------------------------------------|--------------------|
| Empirical formula                     | C19.5H15.5F3N1.5O3 |
| Formula weight                        | 375.83             |
| Temperature/K                         | 293(2)             |
| Crystal system                        | Triclinic          |
| Space group                           | $\bar{P}1$         |
| a/ $\text{\AA}$                       | 10.77(2)           |
| b/ $\text{\AA}$                       | 12.65(3)           |
| c/ $\text{\AA}$                       | 14.33(3)           |
| $\alpha/^\circ$                       | 66.97(3)           |
| $\beta/^\circ$                        | 83.86(3)           |
| $\gamma/^\circ$                       | 77.09(3)           |
| Volume/ $\text{\AA}^3$                | 1750(7)            |
| Z                                     | 4                  |
| $\rho_{\text{calc}}/\text{g cm}^{-3}$ | 1.426              |
| $\mu/\text{mm}^{-1}$                  | 0.118              |
| F(000)                                | 776.0              |

|                                                  |                                                                        |
|--------------------------------------------------|------------------------------------------------------------------------|
| Crystal size/mm <sup>3</sup>                     | 0.10 × 0.09 × 0.04                                                     |
| Radiation                                        | MoK $\alpha$ ( $\lambda$ = 0.71073)                                    |
| 2 $\Theta$ range for data collection/ $^{\circ}$ | 4.724 to 49.996                                                        |
| Index ranges                                     | -12 $\leq$ h $\leq$ 12, -15 $\leq$ k $\leq$ 15, -16 $\leq$ l $\leq$ 17 |
| Reflections collected                            | 10758                                                                  |
| Independent reflections                          | 5987 [Rint = 0.1755, Rsigma = 0.3271]                                  |
| Data/restraints/parameters                       | 5987/96/550                                                            |
| Goodness-of-fit on F <sup>2</sup>                | 0.953                                                                  |
| Final R indexes [ $I \geq 2\sigma(I)$ ]          | R1 = 0.1204, wR2 = 0.2337                                              |
| Largest diff. peak/hole / e $\text{\AA}^{-3}$    | 0.46/-0.39                                                             |

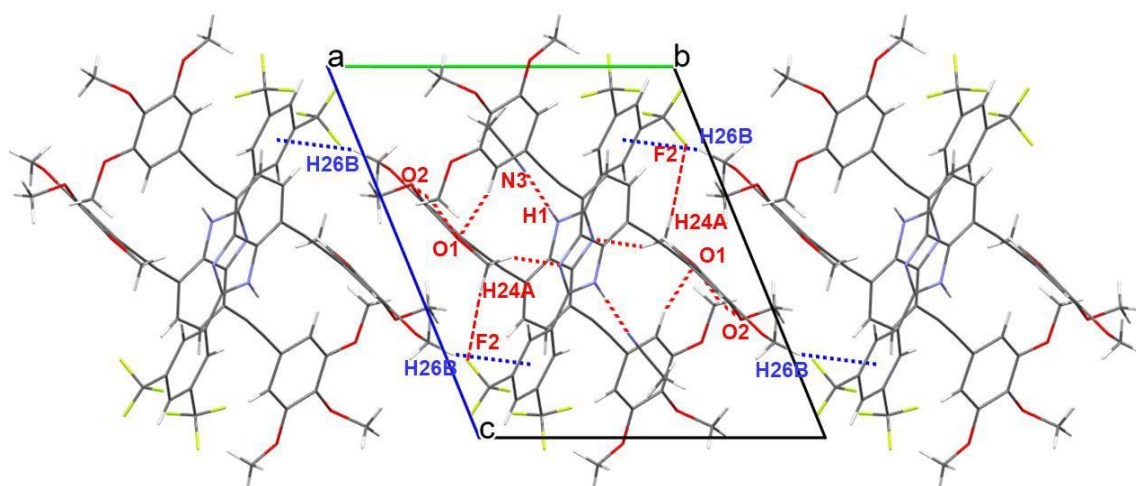

**Figure S2.** View of packing for compound **1b** showing hydrogen bonding (red lines) and CH $\cdots$  $\pi$  (blue lines) interactions.

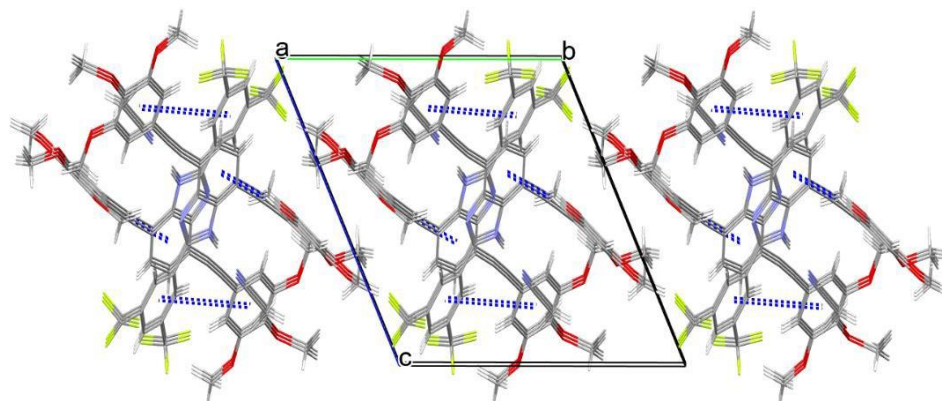

**Figure S3.** View of  $\pi\cdots\pi$  and C-H $\cdots\pi$  interactions along *a* axis for compound **1b**.
